# Supplementary material for: Proximity interactions of the ubiquitin ligase Mind bomb 1 reveal a role in regulation of epithelial polarity complex proteins
Source: PubMed Central journal article supplement (PMC6713736; doi:10.1038/s41598-019-48902-x), 2019-08-28

# **Proximity interactions of the ubiquitin ligase Mind bomb 1 reveal a role in regulation of epithelial polarity complex proteins**

Dho, Sascha E.<sup>1</sup>, Silva- Gagliardi, Nancy<sup>1</sup>, Morgese, Fabio<sup>1</sup>, Coyaud, Etienne<sup>2</sup>, Lamoureux, Emily<sup>1</sup>, Berry, Donna M.<sup>1</sup>, Raught, Brian <sup>2,3</sup>, and C. Jane McGlade<sup>1,3\*</sup>

## **Supplementary Tables and Figures**

1. Supplementary Table S2: GO Enrichment Analysis
2. Supplementary Figure S1. Expression of Flag-EPB41L5/IRES/GFP and T7-MIB1 in Hela cells used for morphology assay.
3. Supplementary Figure S2: Identification of EPB41L5 binding partners by LC MS/MS.
4. Supplementary Figure S3: MIB1 relocalization to the plasma membrane when co-expressed with EPB41L5 requires the EPB41L5 interaction region.
5. Supplementary Figure S4: Original western blots showing cropped regions used to prepare figures in the main text.

## Supplementary Table S2: GO Enrichment Analysis

| Annotation Cluster 1 |            | Enrichment Score: 7.757390046319508                   |       |       |             |             |            |          |           |              |            |            |            |
|----------------------|------------|-------------------------------------------------------|-------|-------|-------------|-------------|------------|----------|-----------|--------------|------------|------------|------------|
| Category             | Term       |                                                       | Count | %     | PValue      | Genes       | List Total | Pop Hits | Pop Total | Fold Enrichm | Bonferroni | Benjamini  | FDR        |
| GOTERM_BP_DIRECT     | GO:0000086 | G2/M transition of mitotic cell cycle                 | 15    | 9.62  | 7.27982E-12 | 93323, 51C  | 140        | 137      | 16792     | 13.13        | 5.47E-09   | 2.74E-09   | 1.11E-08   |
| GOTERM_BP_DIRECT     | GO:0051297 | centrosome organization                               | 9     | 5.77  | 2.09838E-10 | 93323, 117  | 140        | 33       | 16792     | 32.71        | 1.58E-07   | 5.26E-08   | 3.19E-07   |
| GOTERM_CC_DIRECT     | GO:0070652 | HAUS complex                                          | 6     | 3.85  | 1.75168E-09 | 93323, 794  | 148        | 8        | 18224     | 92.35        | 4.10E-07   | 1.02E-07   | 2.25E-06   |
| GOTERM_BP_DIRECT     | GO:0051225 | spindle assembly                                      | 7     | 4.49  | 7.40592E-08 | 93323, 794  | 140        | 27       | 16792     | 31.10        | 5.57E-05   | 1.39E-05   | 1.13E-04   |
| GOTERM_BP_DIRECT     | GO:0007067 | mitotic nuclear division                              | 14    | 8.97  | 1.45417E-07 | 93323, 794  | 140        | 248      | 16792     | 6.77         | 1.09E-04   | 2.19E-05   | 2.21E-04   |
| GOTERM_BP_DIRECT     | GO:0051301 | cell division                                         | 16    | 10.26 | 2.12656E-07 | 93323, 784  | 140        | 350      | 16792     | 5.48         | 1.60E-04   | 2.67E-05   | 3.24E-04   |
| GOTERM_CC_DIRECT     | GO:0005874 | microtubule                                           | 15    | 9.62  | 2.30558E-07 | 93323, 784  | 148        | 311      | 18224     | 5.94         | 5.39E-05   | 8.99E-06   | 2.96E-04   |
| GOTERM_CC_DIRECT     | GO:0005819 | spindle                                               | 9     | 5.77  | 6.17682E-06 | 79848, 794  | 148        | 121      | 18224     | 9.16         | 0.00144434 | 1.81E-04   | 0.00794045 |
| Annotation Cluster 2 |            | Enrichment Score: 4.376357251331086                   |       |       |             |             |            |          |           |              |            |            |            |
| Category             | Term       |                                                       | Count | %     | PValue      | Genes       | List Total | Pop Hits | Pop Total | Fold Enrichm | Bonferroni | Benjamini  | FDR        |
| GOTERM_BP_DIRECT     | GO:0042059 | negative regulation of epidermal growth factor recept | 11    | 7.05  | 2.30333E-13 | 161, 163, 5 | 140        | 36       | 16792     | 36.65        | 1.73E-10   | 1.73E-10   | 3.51E-10   |
| GOTERM_CC_DIRECT     | GO:0030122 | AP-2 adaptor complex                                  | 7     | 4.49  | 4.07201E-10 | 161, 163, 9 | 148        | 13       | 18224     | 66.30        | 9.53E-08   | 3.18E-08   | 5.23E-07   |
| GOTERM_BP_DIRECT     | GO:0072583 | clathrin-mediated endocytosis                         | 6     | 3.85  | 5.07274E-07 | 161, 163, 1 | 140        | 20       | 16792     | 35.98        | 3.81E-04   | 5.45E-05   | 7.72E-04   |
| GOTERM_MF_DIRECT     | GO:0035615 | clathrin adaptor activity                             | 5     | 3.21  | 8.15198E-07 | 161, 163, 1 | 137        | 10       | 16881     | 61.61        | 1.73E-04   | 8.64E-05   | 0.00103151 |
| GOTERM_CC_DIRECT     | GO:0036020 | endolysosome membrane                                 | 5     | 3.21  | 1.91297E-06 | 161, 163, 1 | 148        | 12       | 18224     | 51.31        | 4.48E-04   | 6.39E-05   | 0.00245922 |
| GOTERM_BP_DIRECT     | GO:0006886 | intracellular protein transport                       | 11    | 7.05  | 2.71801E-05 | 161, 1020,  | 140        | 236      | 16792     | 5.59         | 0.02023223 | 0.00204188 | 0.0413743  |
| GOTERM_BP_DIRECT     | GO:0048013 | ephrin receptor signaling pathway                     | 7     | 4.49  | 7.88401E-05 | 161, 163, 6 | 140        | 86       | 16792     | 9.76         | 0.05756666 | 0.00492865 | 0.11996853 |
| GOTERM_BP_DIRECT     | GO:0050690 | regulation of defense response to virus by virus      | 5     | 3.21  | 7.88908E-05 | 161, 163, 1 | 140        | 28       | 16792     | 21.42        | 0.05760258 | 0.00455331 | 0.12004562 |
| GOTERM_BP_DIRECT     | GO:0048268 | clathrin coat assembly                                | 4     | 2.56  | 0.000149392 | 163, 11554  | 140        | 13       | 16792     | 36.91        | 0.10626989 | 0.00699737 | 0.22721172 |
| GOTERM_CC_DIRECT     | GO:0030666 | endocytic vesicle membrane                            | 6     | 3.85  | 0.000191899 | 161, 163, 1 | 148        | 66       | 18224     | 11.19        | 0.04391524 | 0.00407429 | 0.24641938 |
| GOTERM_CC_DIRECT     | GO:0030669 | clathrin-coated endocytic vesicle membrane            | 5     | 3.21  | 0.000326321 | 161, 163, 1 | 148        | 41       | 18224     | 15.02        | 0.07352803 | 0.00448236 | 0.4186976  |
| GOTERM_BP_DIRECT     | GO:0007018 | microtubule-based movement                            | 6     | 3.85  | 0.000559468 | 161, 163, 1 | 140        | 81       | 16792     | 8.88         | 0.34350333 | 0.02445126 | 0.84842145 |
| GOTERM_BP_DIRECT     | GO:0060071 | Wnt signaling pathway, planar cell polarity pathway   | 6     | 3.85  | 0.000998721 | 161, 163, 1 | 140        | 92       | 16792     | 7.82         | 0.5283006  | 0.03687365 | 1.50982109 |
| GOTERM_BP_DIRECT     | GO:0019886 | antigen processing and presentation of exogenous p    | 5     | 3.21  | 0.007161458 | 161, 163, 1 | 140        | 92       | 16792     | 6.52         | 0.99550501 | 0.15540645 | 10.3652509 |
| GOTERM_CC_DIRECT     | GO:0030131 | clathrin adaptor complex                              | 3     | 1.92  | 0.007200785 | 161, 163, 1 | 148        | 16       | 18224     | 23.09        | 0.81567958 | 0.07398723 | 8.8720897  |
| GOTERM_CC_DIRECT     | GO:0030117 | membrane coat                                         | 3     | 1.92  | 0.018503454 | 161, 163, 1 | 148        | 26       | 18224     | 14.21        | 0.98735341 | 0.14944437 | 21.3453315 |
| GOTERM_MF_DIRECT     | GO:0008565 | protein transporter activity                          | 4     | 2.56  | 0.020368871 | 161, 163, 1 | 137        | 72       | 16881     | 6.85         | 0.98725716 | 0.32740834 | 22.9255495 |
| GOTERM_BP_DIRECT     | GO:0016192 | vesicle-mediated transport                            | 4     | 2.56  | 0.131917287 | 161, 163, 1 | 140        | 152      | 16792     | 3.16         | 1          | 0.81522884 | 88.3967684 |
| Annotation Cluster 3 |            | Enrichment Score: 2.9147289108024097                  |       |       |             |             |            |          |           |              |            |            |            |
| Category             | Term       |                                                       | Count | %     | PValue      | Genes       | List Total | Pop Hits | Pop Total | Fold Enrichm | Bonferroni | Benjamini  | FDR        |
| GOTERM_CC_DIRECT     | GO:0016282 | eukaryotic 43S preinitiation complex                  | 4     | 2.56  | 0.000217906 | 8662, 8661  | 148        | 15       | 18224     | 32.84        | 0.04971708 | 0.00391505 | 0.27977174 |
| GOTERM_CC_DIRECT     | GO:0033290 | eukaryotic 48S preinitiation complex                  | 4     | 2.56  | 0.000217906 | 8662, 8661  | 148        | 15       | 18224     | 32.84        | 0.04971708 | 0.00391505 | 0.27977174 |
| GOTERM_CC_DIRECT     | GO:0005852 | eukaryotic translation initiation factor 3 complex    | 4     | 2.56  | 0.00032183  | 8662, 8661  | 148        | 17       | 18224     | 28.97        | 0.07255356 | 0.00469645 | 0.41294612 |
| GOTERM_BP_DIRECT     | GO:0001731 | formation of translation preinitiation complex        | 4     | 2.56  | 0.000870674 | 8662, 8661  | 140        | 23       | 16792     | 20.86        | 0.48057458 | 0.03388787 | 1.31744302 |
| GOTERM_CC_DIRECT     | GO:0071541 | eukaryotic translation initiation factor 3 complex, e | 3     | 1.92  | 0.00132157  | 8662, 8661  | 148        | 7        | 18224     | 52.77        | 0.26615096 | 0.01535351 | 1.68572492 |
| GOTERM_MF_DIRECT     | GO:0003743 | translation initiation factor activity                | 5     | 3.21  | 0.001474097 | 9470, 8662  | 137        | 61       | 16881     | 10.10        | 0.26855923 | 0.06063185 | 1.84930867 |
| GOTERM_BP_DIRECT     | GO:0006446 | regulation of translational initiation                | 4     | 2.56  | 0.00324534  | 8662, 8661  | 140        | 36       | 16792     | 13.33        | 0.91322743 | 0.08359999 | 4.82866524 |
| GOTERM_BP_DIRECT     | GO:0006413 | translational initiation                              | 6     | 3.85  | 0.005685435 | 9470, 8662  | 140        | 137      | 16792     | 5.25         | 0.9862628  | 0.12917236 | 8.31478483 |
| GOTERM_MF_DIRECT     | GO:0031369 | translation initiation factor binding                 | 3     | 1.92  | 0.012239971 | 8662, 7286  | 137        | 21       | 16881     | 17.60        | 0.92653052 | 0.25181002 | 14.429874  |
| Annotation Cluster 4 |            | Enrichment Score: 2.2774804592397127                  |       |       |             |             |            |          |           |              |            |            |            |
| Category             | Term       |                                                       | Count | %     | PValue      | Genes       | List Total | Pop Hits | Pop Total | Fold Enrichm | Bonferroni | Benjamini  | FDR        |
| GOTERM_CC_DIRECT     | GO:0033565 | ESCRT-0 complex                                       | 3     | 1.92  | 0.000192849 | 10254, 802  | 148        | 3        | 18224     | 123.14       | 0.04412781 | 0.00375386 | 0.24763798 |
| GOTERM_BP_DIRECT     | GO:0016197 | endosomal transport                                   | 5     | 3.21  | 0.002178226 | 10254, 887  | 140        | 66       | 16792     | 9.09         | 0.80598365 | 0.0634876  | 3.26550849 |
| GOTERM_CC_DIRECT     | GO:0031901 | early endosome membrane                               | 5     | 3.21  | 0.014504528 | 399979, 2C  | 148        | 116      | 18224     | 5.31         | 0.96725205 | 0.12781751 | 17.1245603 |

|                  |            |                              |   |      |             |            |     |     |       |       |            |            |            |
|------------------|------------|------------------------------|---|------|-------------|------------|-----|-----|-------|-------|------------|------------|------------|
| GOTERM_BP_DIRECT | GO:0006914 | autophagy                    | 5 | 3.21 | 0.024870216 | 9779, 1025 | 140 | 133 | 16792 | 4.51  | 0.99999999 | 0.36992999 | 31.8488962 |
| GOTERM_BP_DIRECT | GO:0036258 | multivesicular body assembly | 3 | 1.92 | 0.027045418 | 10254, 802 | 140 | 31  | 16792 | 11.61 | 1          | 0.38090344 | 34.1271211 |

Annotation Cluster 5 Enrichment Score: 2.1743126331310445

| Category         | Term       | Count                                                  | % | PValue | Genes       | List Total | Pop Hits | Pop Total | Fold Enrichm | Bonferroni | Benjamini  | FDR        |            |
|------------------|------------|--------------------------------------------------------|---|--------|-------------|------------|----------|-----------|--------------|------------|------------|------------|------------|
| GOTERM_BP_DIRECT | GO:0070911 | global genome nucleotide-excision repair               | 5 | 3.21   | 0.000135044 | 7341, 8451 | 140      | 32        | 16792        | 18.74      | 0.09657293 | 0.00722803 | 0.20541007 |
| GOTERM_BP_DIRECT | GO:0000717 | nucleotide-excision repair, DNA duplex unwinding       | 4 | 2.56   | 0.000761703 | 8451, 845C | 140      | 22        | 16792        | 21.81      | 0.4361794  | 0.03133302 | 1.15344862 |
| GOTERM_BP_DIRECT | GO:0000715 | nucleotide-excision repair, DNA damage recognition     | 4 | 2.56   | 0.000870674 | 8451, 845C | 140      | 23        | 16792        | 20.86      | 0.48057458 | 0.03388787 | 1.31744302 |
| GOTERM_BP_DIRECT | GO:0006294 | nucleotide-excision repair, preincision complex asse   | 4 | 2.56   | 0.001732438 | 8451, 845C | 140      | 29        | 16792        | 16.54      | 0.72853528 | 0.05511524 | 2.60542093 |
| GOTERM_BP_DIRECT | GO:0042769 | DNA damage response, detection of DNA damage           | 4 | 2.56   | 0.00324534  | 8451, 845C | 140      | 36        | 16792        | 13.33      | 0.91322743 | 0.08359999 | 4.82866524 |
| GOTERM_BP_DIRECT | GO:0006296 | nucleotide-excision repair, DNA incision, 5'-to lesior | 4 | 2.56   | 0.0035105   | 8451, 845C | 140      | 37        | 16792        | 12.97      | 0.928962   | 0.0871567  | 5.21340489 |
| GOTERM_BP_DIRECT | GO:0033683 | nucleotide-excision repair, DNA incision               | 4 | 2.56   | 0.003788536 | 8451, 845C | 140      | 38        | 16792        | 12.63      | 0.94240902 | 0.09076011 | 5.61526719 |
| GOTERM_BP_DIRECT | GO:0006293 | nucleotide-excision repair, preincision complex stat   | 3 | 1.92   | 0.012888035 | 8451, 845C | 140      | 21        | 16792        | 17.13      | 0.99994198 | 0.24323955 | 17.9218784 |
| GOTERM_BP_DIRECT | GO:0006295 | nucleotide-excision repair, DNA incision, 3'-to lesior | 3 | 1.92   | 0.015360668 | 8451, 845C | 140      | 23        | 16792        | 15.64      | 0.9999912  | 0.26386252 | 20.9970071 |
| GOTERM_BP_DIRECT | GO:0006283 | transcription-coupled nucleotide-excision repair       | 4 | 2.56   | 0.02347942  | 8451, 845C | 140      | 74        | 16792        | 6.48       | 0.99999998 | 0.36024995 | 30.3538701 |
| GOTERM_BP_DIRECT | GO:0042787 | protein ubiquitination involved in ubiquitin-depend    | 5 | 3.21   | 0.038386209 | 5347, 8451 | 140      | 153       | 16792        | 3.92       | 1          | 0.46542219 | 44.8961999 |
| GOTERM_MF_DIRECT | GO:0061630 | ubiquitin protein ligase activity                      | 4 | 2.56   | 0.191583872 | 8315, 8451 | 137      | 187       | 16881        | 2.64       | 1          | 0.84720509 | 93.2195215 |
| GOTERM_BP_DIRECT | GO:0043161 | proteasome-mediated ubiquitin-dependent protei         | 4 | 2.56   | 0.236724205 | 8451, 9978 | 140      | 203       | 16792        | 2.36       | 1          | 0.93336745 | 98.3639403 |

Annotation Cluster 6 Enrichment Score: 1.953777794242805

| Category         | Term       | Count                                                | % | PValue | Genes       | List Total | Pop Hits | Pop Total | Fold Enrichm | Bonferroni | Benjamini  | FDR        |            |
|------------------|------------|------------------------------------------------------|---|--------|-------------|------------|----------|-----------|--------------|------------|------------|------------|------------|
| GOTERM_BP_DIRECT | GO:0070423 | nucleotide-binding oligomerization domain contain    | 5 | 3.21   | 4.9689E-05  | 23118, 104 | 140      | 25        | 16792        | 23.99      | 0.03667749 | 0.00339124 | 0.07562583 |
| GOTERM_CC_DIRECT | GO:0010008 | endosome membrane                                    | 8 | 5.13   | 0.000766167 | 9779, 2311 | 148      | 185       | 18224        | 5.32       | 0.1641882  | 0.00991451 | 0.9805006  |
| GOTERM_BP_DIRECT | GO:0007179 | transforming growth factor beta receptor signaling   | 6 | 3.85   | 0.000998721 | 9958, 4738 | 140      | 92        | 16792        | 7.82       | 0.5283006  | 0.03687365 | 1.50982109 |
| GOTERM_BP_DIRECT | GO:0007249 | I-kappaB kinase/NF-kappaB signaling                  | 5 | 3.21   | 0.001531154 | 23118, 104 | 140      | 60        | 16792        | 10.00      | 0.68409379 | 0.05102965 | 2.30599846 |
| GOTERM_BP_DIRECT | GO:0002755 | MyD88-dependent toll-like receptor signaling pathw   | 4 | 2.56   | 0.002525136 | 23118, 104 | 140      | 33        | 16792        | 14.54      | 0.85062631 | 0.06799647 | 3.77629028 |
| GOTERM_BP_DIRECT | GO:0007254 | JNK cascade                                          | 4 | 2.56   | 0.007745364 | 23118, 104 | 140      | 49        | 16792        | 9.79       | 0.99711199 | 0.16237727 | 11.1645115 |
| GOTERM_BP_DIRECT | GO:0002223 | stimulatory C-type lectin receptor signaling pathwa  | 4 | 2.56   | 0.056566796 | 23118, 104 | 140      | 105       | 16792        | 4.57       | 1          | 0.56919134 | 58.7929391 |
| GOTERM_BP_DIRECT | GO:0000187 | activation of MAPK activity                          | 4 | 2.56   | 0.059197228 | 23118, 104 | 140      | 107       | 16792        | 4.48       | 1          | 0.57929277 | 60.5079196 |
| GOTERM_BP_DIRECT | GO:0051092 | positive regulation of NF-kappaB transcription factc | 4 | 2.56   | 0.099240686 | 23118, 104 | 140      | 133       | 16792        | 3.61       | 1          | 0.7360911  | 79.6338885 |
| GOTERM_BP_DIRECT | GO:0043123 | positive regulation of I-kappaB kinase/NF-kappaB si  | 4 | 2.56   | 0.149241293 | 23118, 688 | 140      | 161       | 16792        | 2.98       | 1          | 0.84586046 | 91.4633674 |
| GOTERM_BP_DIRECT | GO:0038095 | Fc-epsilon receptor signaling pathway                | 4 | 2.56   | 0.183253713 | 23118, 104 | 140      | 178       | 16792        | 2.70       | 1          | 0.89689568 | 95.413227  |
| GOTERM_BP_DIRECT | GO:0050852 | T cell receptor signaling pathway                    | 3 | 1.92   | 0.346576489 | 23118, 688 | 140      | 148       | 16792        | 2.43       | 1          | 0.9807568  | 99.8464328 |

Annotation Cluster 7 Enrichment Score: 1.4814722409035246

| Category         | Term       | Count                                           | % | PValue | Genes       | List Total | Pop Hits | Pop Total | Fold Enrichm | Bonferroni | Benjamini  | FDR        |            |
|------------------|------------|-------------------------------------------------|---|--------|-------------|------------|----------|-----------|--------------|------------|------------|------------|------------|
| GOTERM_CC_DIRECT | GO:0005913 | cell-cell adherens junction                     | 8 | 5.13   | 0.015957793 | 117178, 26 | 148      | 323       | 18224        | 3.05       | 0.97681474 | 0.134786   | 18.6820284 |
| GOTERM_MF_DIRECT | GO:0098641 | cadherin binding involved in cell-cell adhesion | 7 | 4.49   | 0.030094909 | 26058, 913 | 137      | 290       | 16881        | 2.97       | 0.99846327 | 0.39244652 | 32.067342  |
| GOTERM_BP_DIRECT | GO:0098609 | cell-cell adhesion                              | 6 | 3.85   | 0.074837179 | 26058, 913 | 140      | 271       | 16792        | 2.66       | 1          | 0.66150149 | 69.4040448 |

Annotation Cluster 8 Enrichment Score: 1.4668518040035676

| Category         | Term       | Count                                               | % | PValue | Genes       | List Total | Pop Hits | Pop Total | Fold Enrichm | Bonferroni | Benjamini | FDR        |            |
|------------------|------------|-----------------------------------------------------|---|--------|-------------|------------|----------|-----------|--------------|------------|-----------|------------|------------|
| GOTERM_BP_DIRECT | GO:0035735 | intraciliary transport involved in cilium morphogen | 3 | 1.92   | 0.001390288 | 117178, 51 | 140      | 7         | 16792        | 51.40      | 0.6487385 | 0.04859953 | 2.09594166 |
| GOTERM_BP_DIRECT | GO:0060271 | cilium morphogenesis                                | 4 | 2.56   | 0.104362232 | 117178, 51 | 140      | 136       | 16792        | 3.53       | 1         | 0.748777   | 81.3273939 |
| GOTERM_BP_DIRECT | GO:0042384 | cilium assembly                                     | 3 | 1.92   | 0.274028878 | 117178, 51 | 140      | 124       | 16792        | 2.90       | 1         | 0.95256564 | 99.2371036 |

Annotation Cluster 9 Enrichment Score: 1.0790518054724672

| Category         | Term       | Count                                                | % | PValue | Genes       | List Total | Pop Hits | Pop Total | Fold Enrichm | Bonferroni | Benjamini  | FDR        |            |
|------------------|------------|------------------------------------------------------|---|--------|-------------|------------|----------|-----------|--------------|------------|------------|------------|------------|
| GOTERM_MF_DIRECT | GO:0004843 | thiol-dependent ubiquitin-specific protease activity | 4 | 2.56   | 0.026794823 | 9958, 7353 | 137      | 80        | 16881        | 6.16       | 0.99684256 | 0.38111315 | 29.0839281 |

|                  |            |                                                |   |      |             |            |     |    |       |      |   |            |            |
|------------------|------------|------------------------------------------------|---|------|-------------|------------|-----|----|-------|------|---|------------|------------|
| GOTERM_MF_DIRECT | GO:0036459 | thiol-dependent ubiquitinyl hydrolase activity | 3 | 1.92 | 0.109311533 | 9958, 8239 | 137 | 70 | 16881 | 5.28 | 1 | 0.68920768 | 76.8869921 |
| GOTERM_BP_DIRECT | GO:0016579 | protein deubiquitination                       | 3 | 1.92 | 0.197755109 | 9958, 8239 | 140 | 99 | 16792 | 3.63 | 1 | 0.90940911 | 96.5081803 |

Annotation Cluster 10 Enrichment Score: 0.7601816526828035

| Category         | Term       |                                          | Count | %    | PValue      | Genes      | List Total | Pop Hits | Pop Total | Fold Enrichm | Bonferroni | Benjamini  | FDR        |
|------------------|------------|------------------------------------------|-------|------|-------------|------------|------------|----------|-----------|--------------|------------|------------|------------|
| GOTERM_BP_DIRECT | GO:0018105 | peptidyl-serine phosphorylation          | 4     | 2.56 | 0.08533973  | 1020, 5347 | 140        | 125      | 16792     | 3.84         | 1          | 0.69175118 | 74.2858651 |
| GOTERM_MF_DIRECT | GO:0004674 | protein serine/threonine kinase activity | 6     | 3.85 | 0.187108687 | 1020, 5347 | 137        | 376      | 16881     | 1.97         | 1          | 0.8518389  | 92.728948  |
| GOTERM_MF_DIRECT | GO:0004672 | protein kinase activity                  | 5     | 3.21 | 0.32825385  | 1020, 5347 | 137        | 359      | 16881     | 1.72         | 1          | 0.94544804 | 99.3490567 |

Annotation Cluster 11 Enrichment Score: 0.735256209049127

| Category         | Term       |                                                      | Count | %     | PValue      | Genes      | List Total | Pop Hits | Pop Total | Fold Enrichm | Bonferroni | Benjamini  | FDR        |
|------------------|------------|------------------------------------------------------|-------|-------|-------------|------------|------------|----------|-----------|--------------|------------|------------|------------|
| GOTERM_CC_DIRECT | GO:0005667 | transcription factor complex                         | 6     | 3.85  | 0.020210022 | 7027, 1876 | 148        | 193      | 18224     | 3.83         | 0.99158372 | 0.15686493 | 23.0854708 |
| GOTERM_MF_DIRECT | GO:0046983 | protein dimerization activity                        | 5     | 3.21  | 0.033174901 | 23269, 187 | 137        | 150      | 16881     | 4.11         | 0.99921701 | 0.37924931 | 34.7470641 |
| GOTERM_MF_DIRECT | GO:0003677 | DNA binding                                          | 14    | 8.97  | 0.598099143 | 84108, 230 | 137        | 1674     | 16881     | 1.03         | 1          | 0.99599971 | 99.9990211 |
| GOTERM_BP_DIRECT | GO:0006351 | transcription, DNA-templated                         | 16    | 10.26 | 0.662541159 | 84108, 109 | 140        | 1955     | 16792     | 0.98         | 1          | 0.99986077 | 99.9999934 |
| GOTERM_MF_DIRECT | GO:0003700 | transcription factor activity, sequence-specific DNA | 7     | 4.49  | 0.793152102 | 84108, 702 | 137        | 961      | 16881     | 0.90         | 1          | 0.99980948 | 99.9999998 |

Supplementary Figure S1

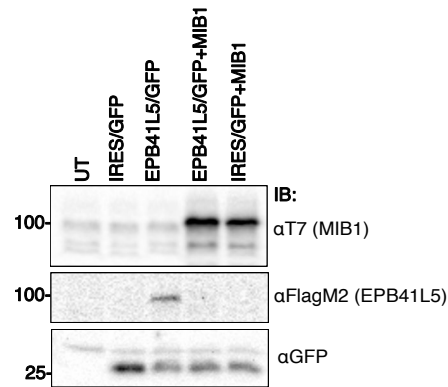

**Figure S1. Expression of Flag-EPB41L5/IRES/GFP and T7-MIB1 in HeLa cells.** Representative immunoblots showing the relative expression of transfected proteins. Equal cell numbers from the cell preparations depicted in Figure 5 were lysed in 2xLaemmli sample buffer and immunoblotted for the transfected proteins as indicated.

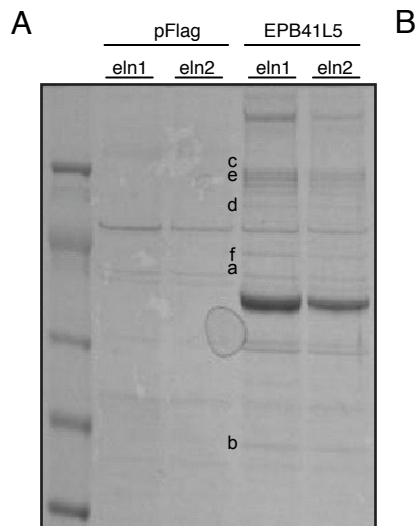

**B**

| Bait    | Common Name of Prey        | No. of Peptides | Protein GI |
|---------|----------------------------|-----------------|------------|
| EPB41L5 | a. Mindbomb (MIB1)         | 12              | 30348954   |
|         | b. NaK Beta 3 subunit      | 1               | 15080119   |
|         | c. Zona Occludens 1 (ZO-1) | 13              | 62945799   |
|         | d. Zona Occludens 2 (ZO-2) | 19              | 13634076   |
|         | e. Crumbs1 (CRB1)          | 2               | 6912322    |
|         | f. Pinin                   | 18              | 33356174   |

**Figure S2. Identification of EPB41L5 interacting proteins.** (A) Representative image of a colloidal Coomassie stained gel used in the identification of EPB41L5 binding partners by LC MS/MS. HEK293T cell lines stably expressing either pFLAG or pFLAG-EPB41L5 were lysed and immunoprecipitated with anti-FLAG M2 affinity gel. Proteins were eluted from the matrix using a 3X FLAG peptide and resolved by NuPage gel electrophoresis. Bands corresponding to proteins unique to the EPB41L5 elutions were excised, processed and subjected to LC MS/MS. (B) A representative summary of the prevalent proteins identified by the mass spectrometer is listed and denoted on the gel. Eln, elution.

**Mass Spectrometry Protein Sample Preparation:** HEK293T stable cell lines over expressing FLAG-EPB41L5 were used in mass spectrometry experiments to identify novel EPB41L5 binding partners. Sample preparation including cell lysis, immunoprecipitation and mass spectrometry (LC-MS/MS) was performed as previously described (Chen and Gingras, 2007). Briefly, 18 150 mm tissue culture plates of 90% confluent cells expressing either pFLAG empty vector or pFLAG-EPB41L5 were lysed in MS lysis buffer [50 mM HEPES-KOH pH 7.5, 150 mM NaCl, 1mM EGTA, 10% glycerol, 0.5% Triton-X100, 100 M ZnCl<sub>2</sub>, 1 mM Na<sub>3</sub>VO<sub>4</sub>, 20 mM β-glycerolphosphate, 10 mM NaF, 1 mM DTT, 10mM Na<sub>4</sub>P<sub>2</sub>O<sub>7</sub>, supplemented with 1 mM PMSF, 1mM MgCl<sub>2</sub>, and 1 COMPLETE protease inhibitor tablet (Roche)], and subjected to two freeze-thaw cycles. Lysates were precleared with sepharose beads, and subjected to anti-FLAG immunoprecipitation (FLAG M2-agarose, Sigma) to isolate EPB41L5 interacting proteins. Immunoaffinity purified proteins were then eluted using 3XFLAG peptide and separated by SDS-PAGE using the NuPage system on a 4-12% gradient gel. The gel was fixed in 50% methanol/7% Acetic Acid and stained with GelCode Blue (Pierce). Gel bands were excised and The Mass Spectrometry Facility/Advanced Protein Technology Centre at The Hospital for Sick Children processed samples and performed LC-MS/MS analyses.

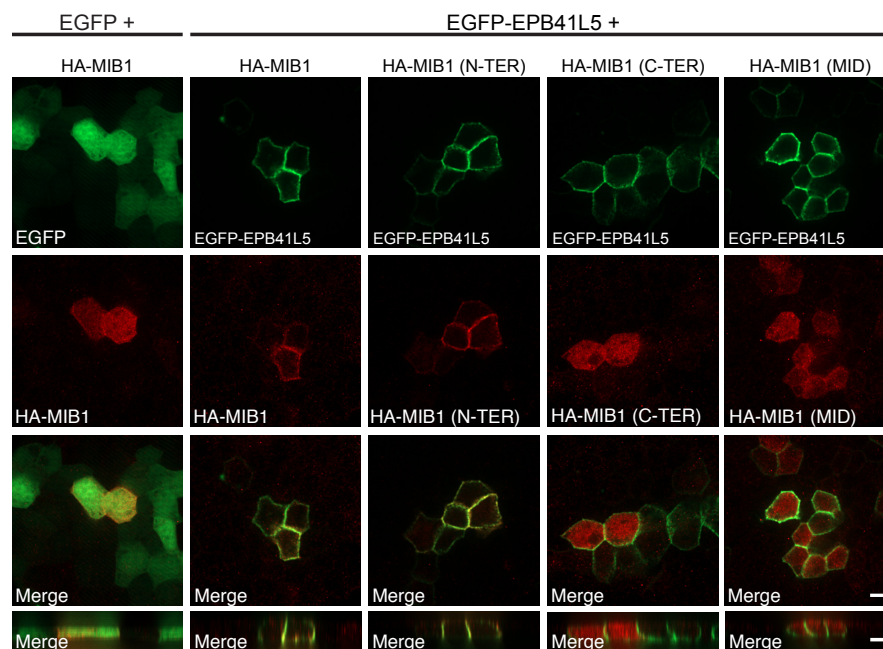

**Figure S3. MIB1 relocation to the plasma membrane when co-expressed with EPB41L5 requires the EPB41L5 interaction region.** Polarized MDCK cells co-transfected with EGFP and HA-MIB1, EGFP-EPB41L5 and HA-MIB1, EGFP-EPB41L5 and HA-MIB1(N-Ter), EGFP-EPB41L5 and HA-MIB1(C-Ter), EGFP-EPB41L5 and HA-MIB1(Mid) where fixed and stained for HA (red). Shown are XY sections taken across the middle of the cell monolayer and XZ sections of the merge (bottom). Images were acquired at 63X magnification on a Quorum spinning disk microscope. Scale bars indicate 10  $\mu$ m.

**Supplementary Figure S4: Original western blots showing cropped regions used to prepare figures in the main text.**

- a. Figure 2a, b and c original blots
- b. Figure 2d and 2e original blots
- c. Figure 3a and 3c original blots
- d. Figure 3d original blots
- e. Figure 3e original blots
- f. Figure 3f original blots
- g. Figure 4a 3b and 4b original blots
- h. Figure 4c original blots
- i. Figure 6b original blots
- j. Figure 6c original blots
- k. Figure 6e original blots
- l. Figure 7a
- m. Figure 7b



**FIGURE 2A, 2B and 2C original blots**

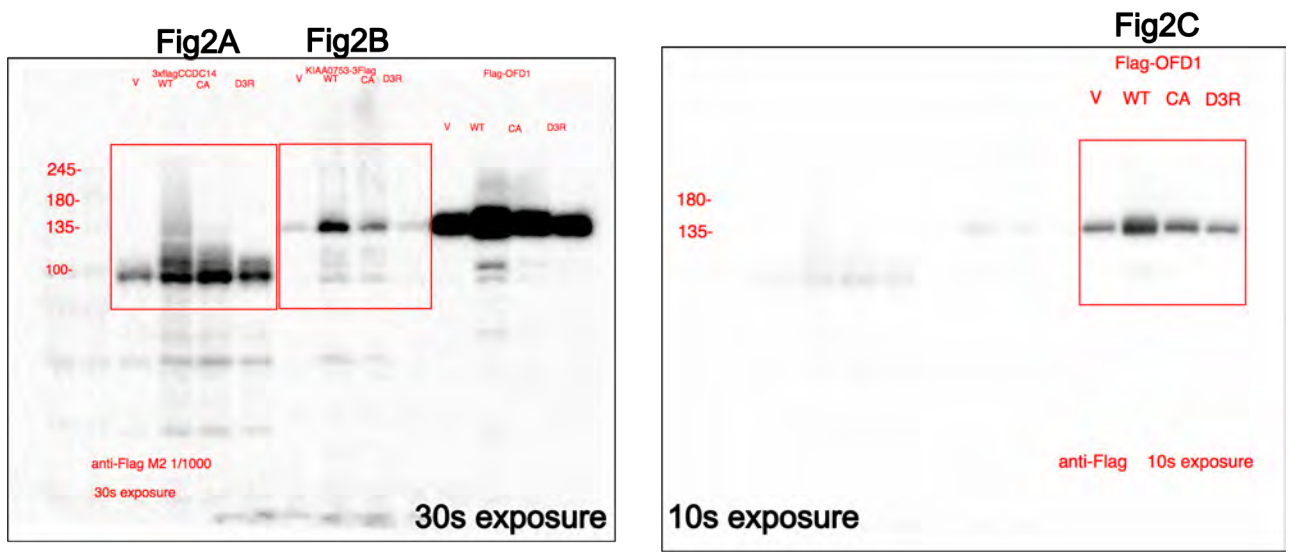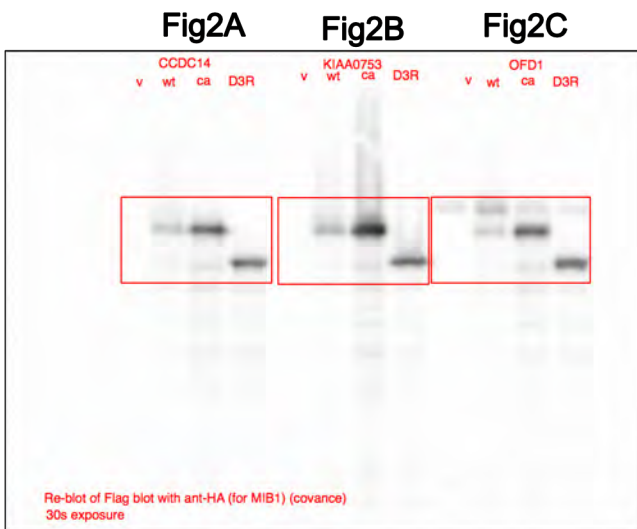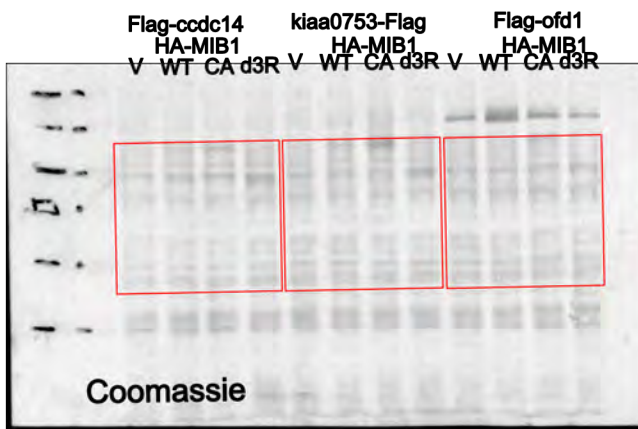

**FIGURE 2D and 2E original blots**

**Fig 2D**

T7-MIB + HA-Ub+  
Flag-ccdc14 kaa0753-Flag  
wt wt ca wt ca

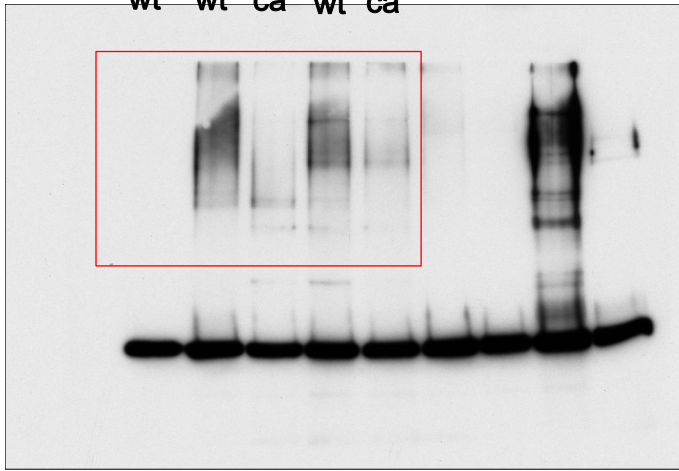

**Fig 2E**

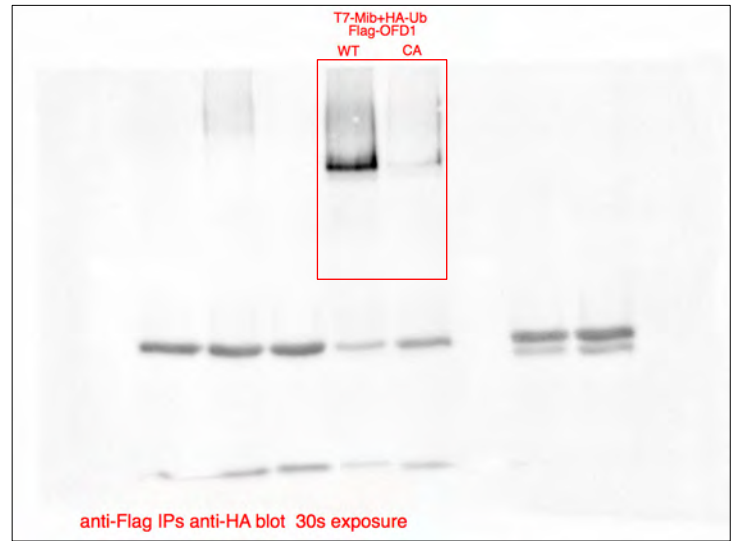

**Fig 2D**

T7-MIB+HA-Ub  
Flag-CCDC14 KIAA0753-Flag  
wt wt ca wt ca

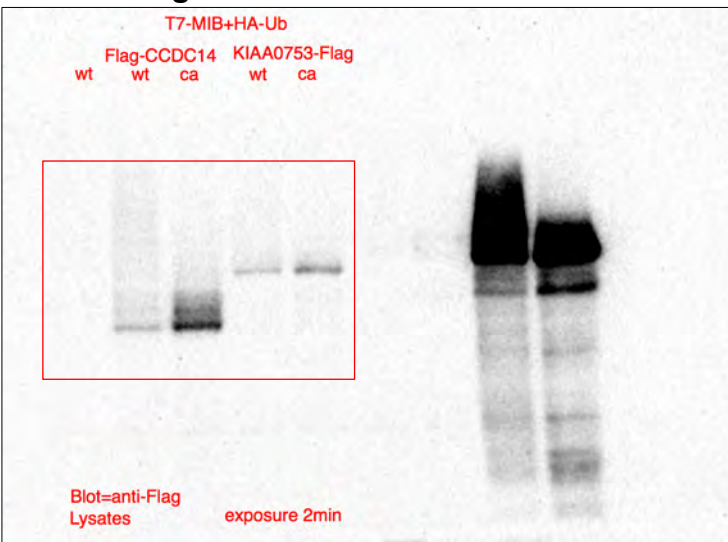

**Fig 2E**  
T7-MIB+HA-Ub  
Flag-OFD1  
wt ca

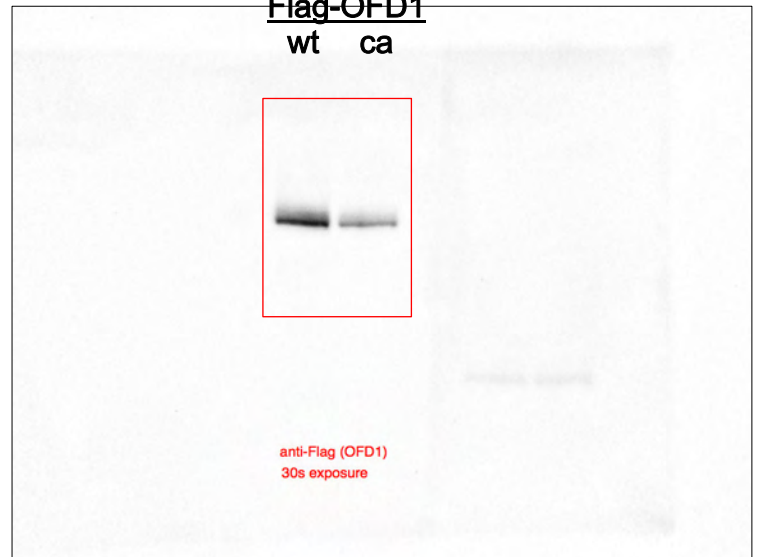

**Fig 2D**

HA-Ub+ T7-Mib1 Flag flag-CCDC14 KIAA0753-Flag Flag-RPGRIP1L Eps15-Flag  
WT WT CA WT CA WT CA WT CA

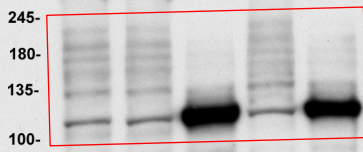

**Fig 2E**

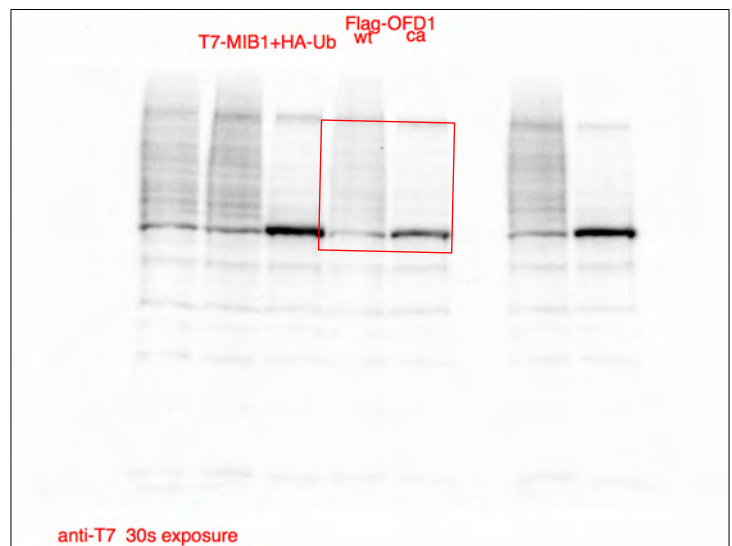

**FIGURE 3A and 3C original blots**

**Fig 3A**

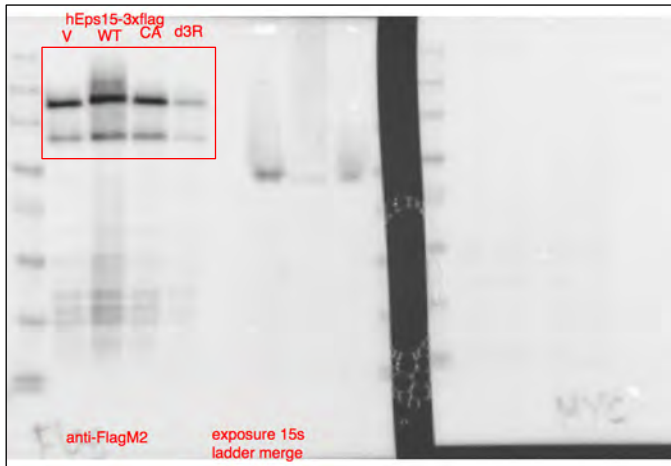

**Fig 3C**

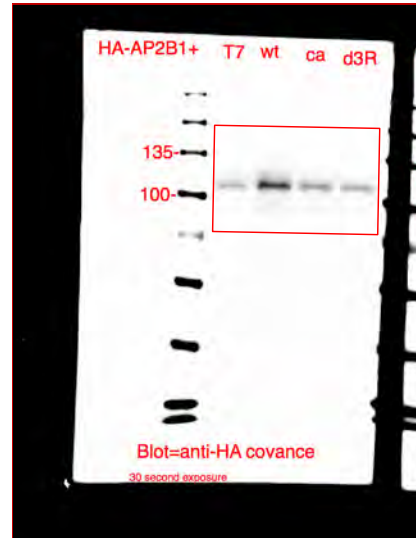

**Fig 3A**

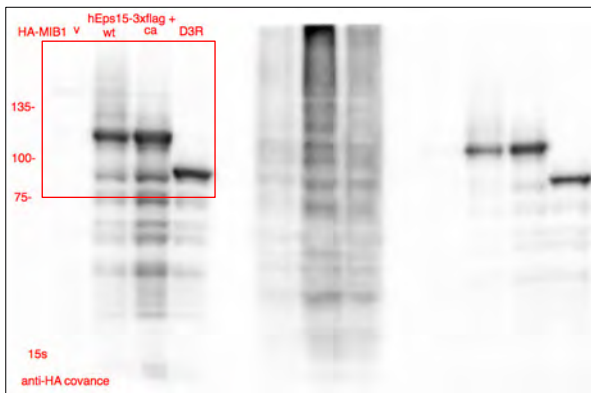

**Fig 3C**

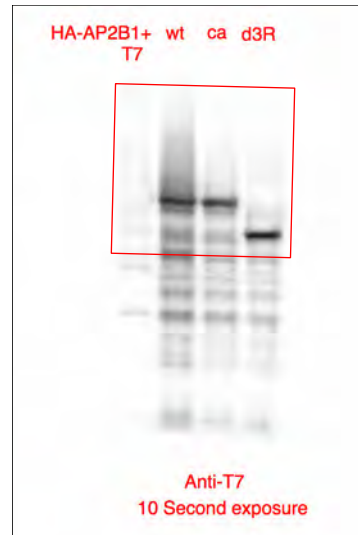

**Fig 3A**

hEps15-Flag  
HA-Mib  
v wt ca d3R

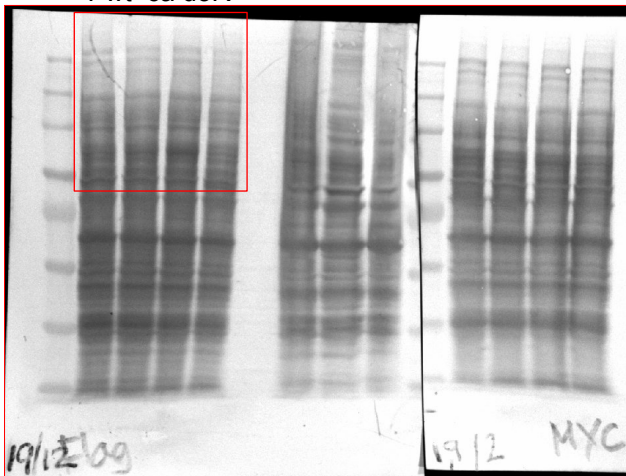

**Fig 3C**

HA-AP2B1  
T7-Mib  
v wt ca d3R

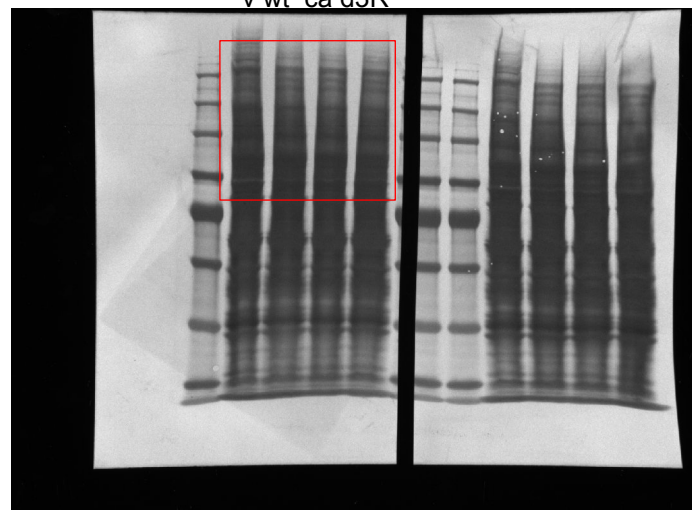

**FIGURE 3D original blots**

**Fig 3D**

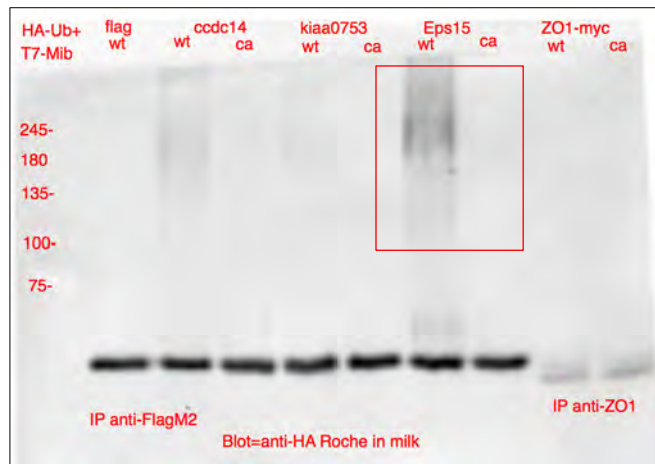

**Fig 3D**

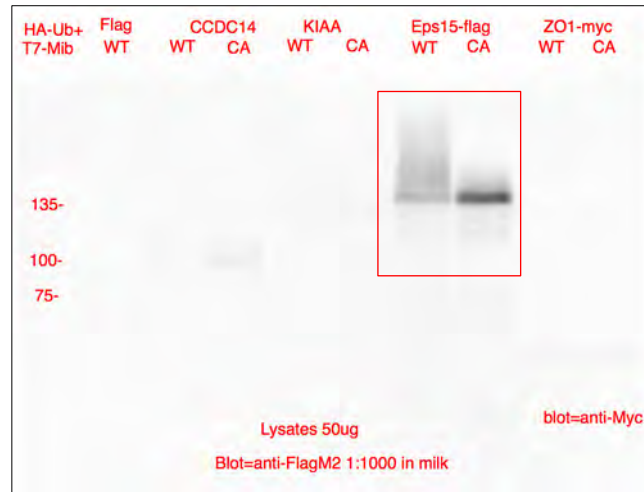

**Fig 3D**

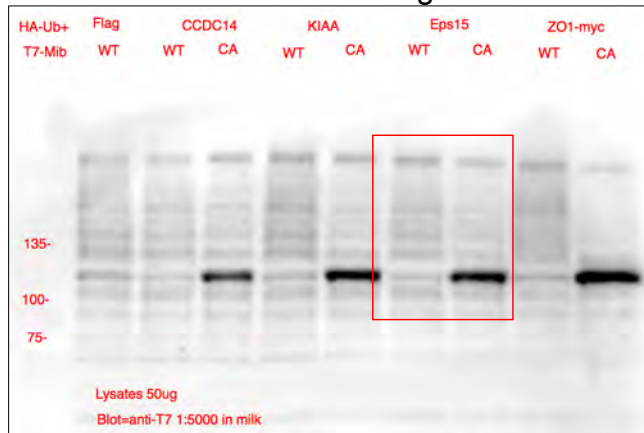

**Figure 3e Original Blots**

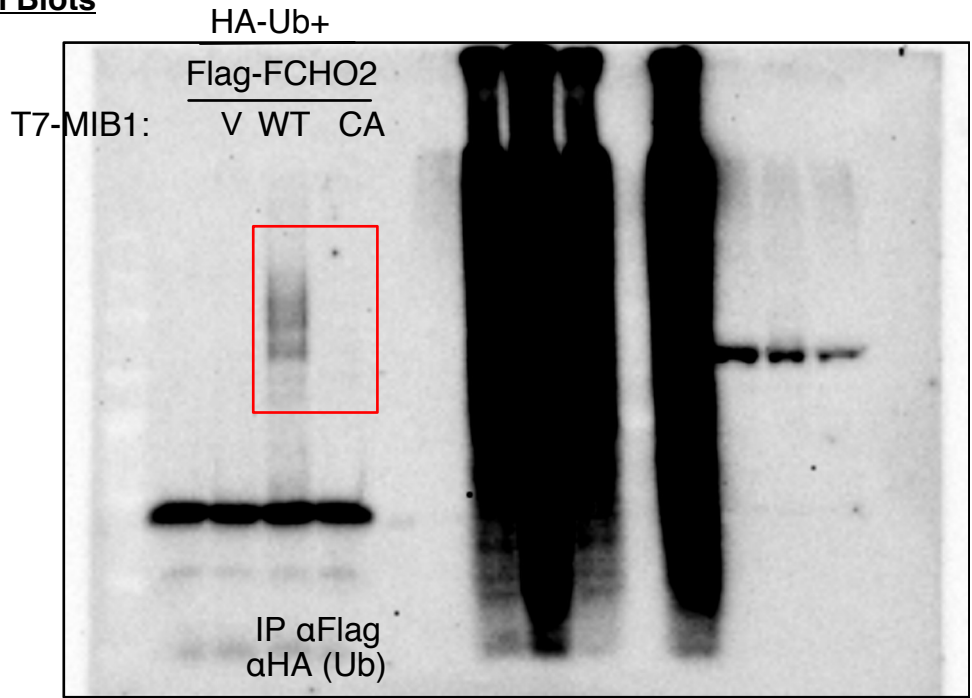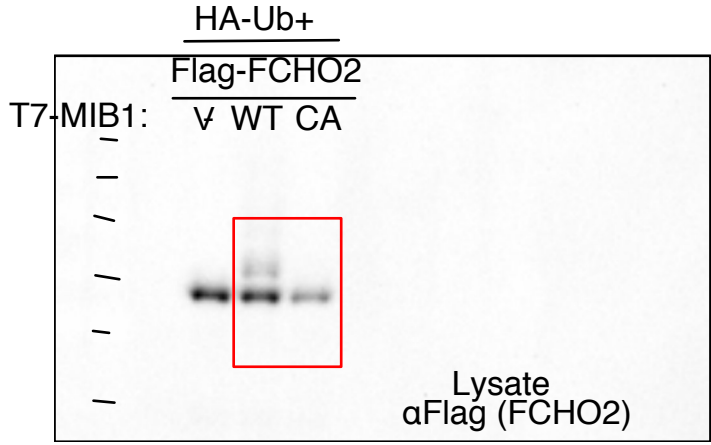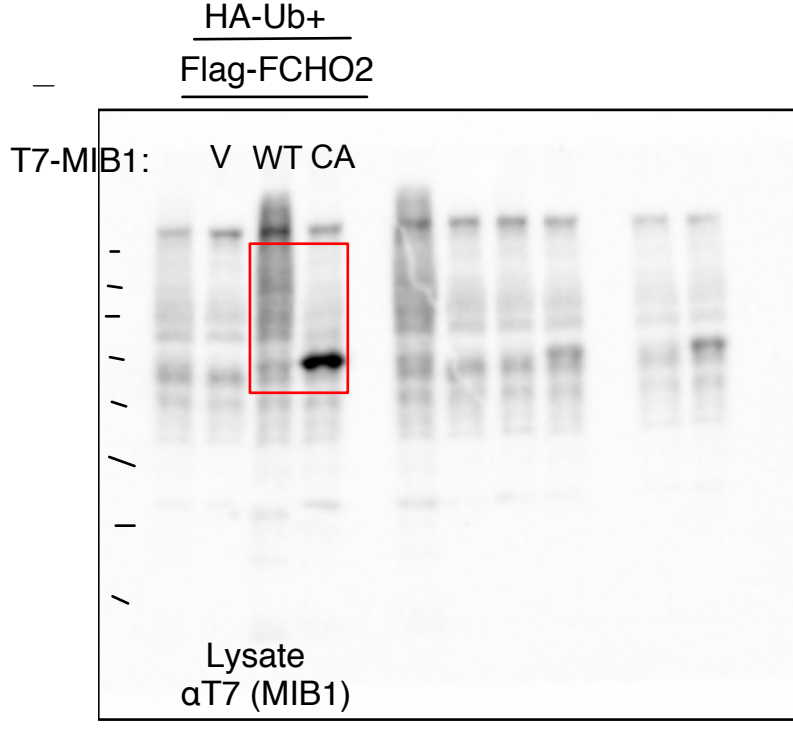



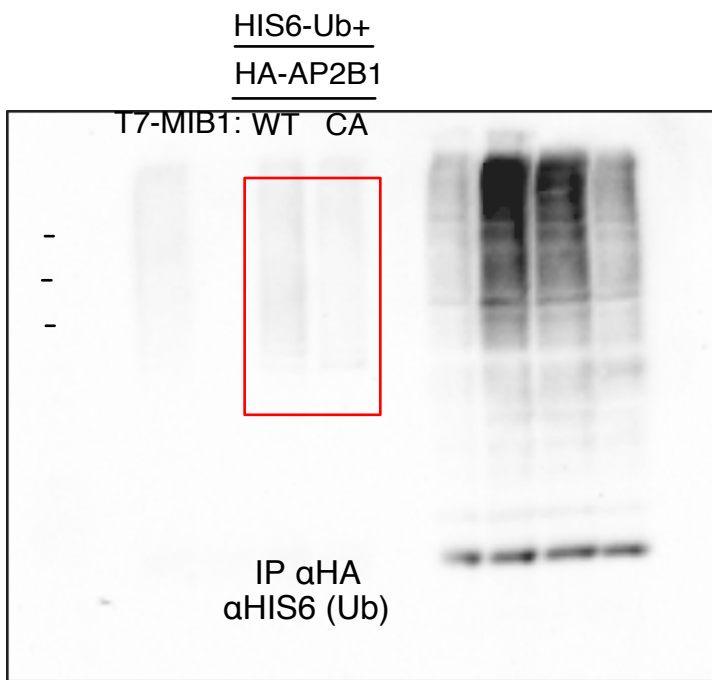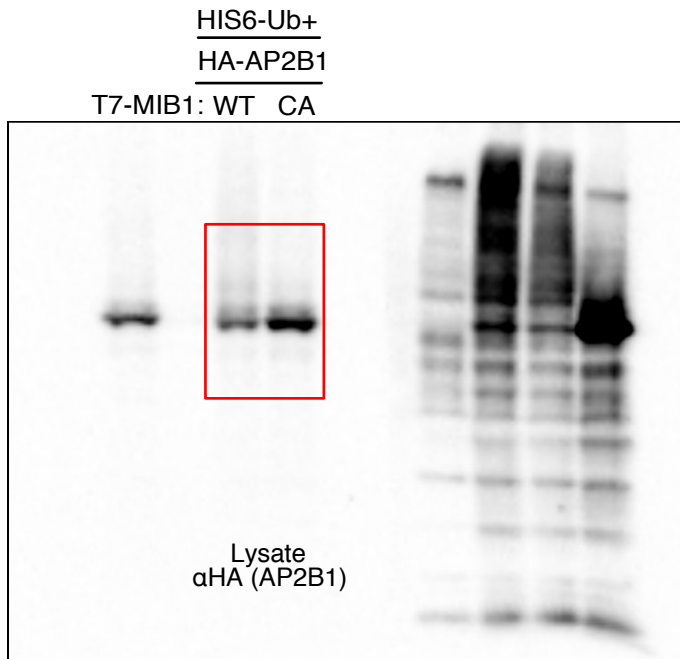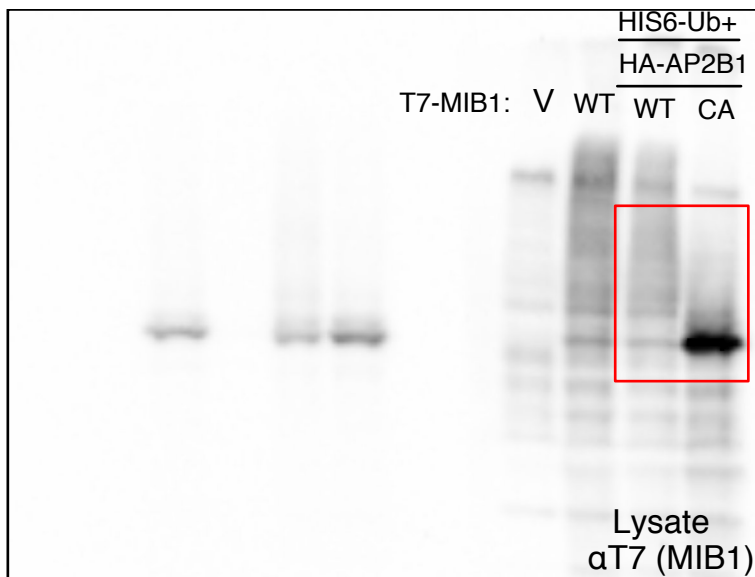

**FIGURE 3B, 4A and 4B original blots**

**Fig 4A**

**Fig 3B**

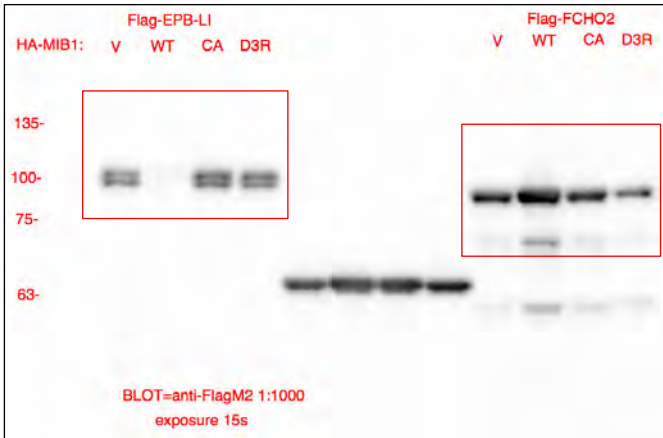

**Fig 4B**

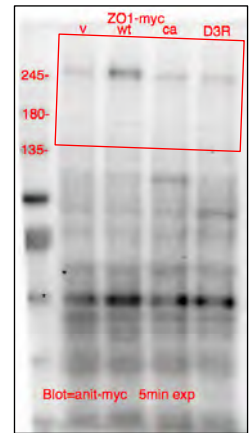

**Fig 4A**  
**Flag-EPB41L5**

**Fig 3B**  
**Flag-FCHO2**

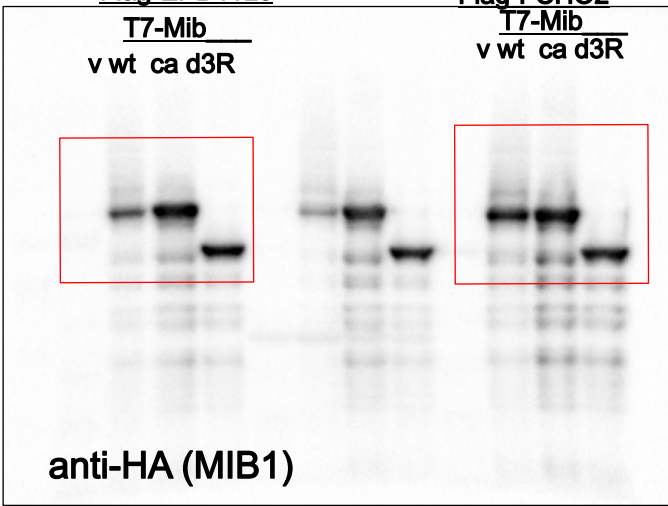

**Fig 4B**

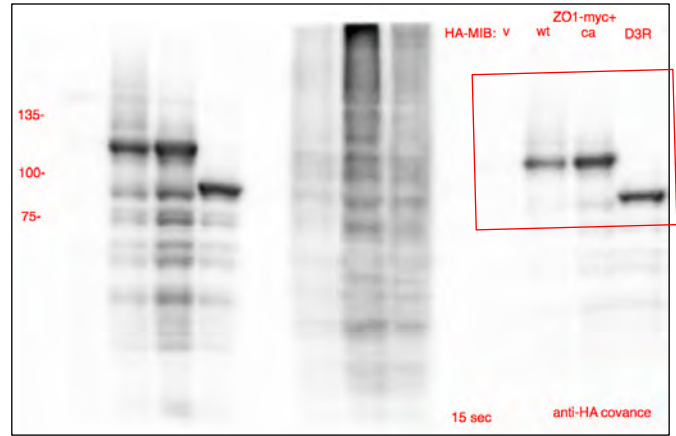

**Fig 4A**

**Flag-EPB41L5**

**T7-Mib**

v wt ca d3R

**Fig 3B**

**Flag-FCHO2**

**T7-Mib**

v wt ca d3R

**Fig 4B**

**ZO1-myc**

**HA-Mib**

v wt ca d3R

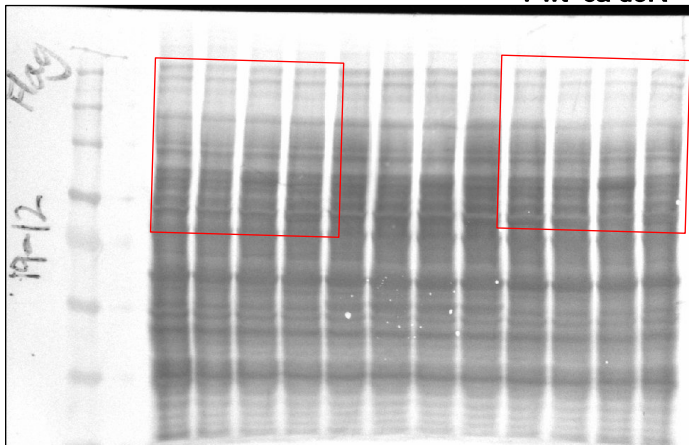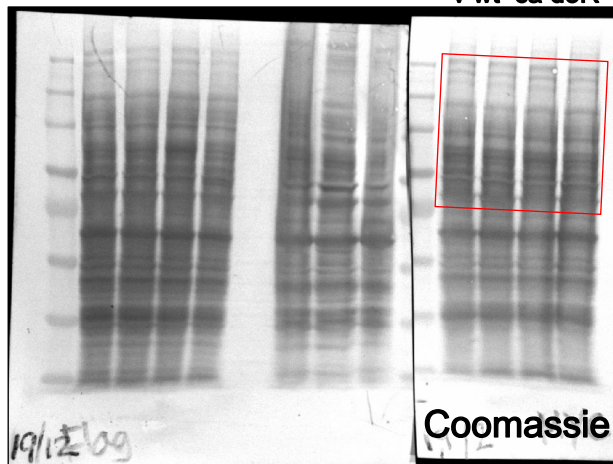

**Coomassie**

**Coomassie**

**FIGURE 4C original blots**

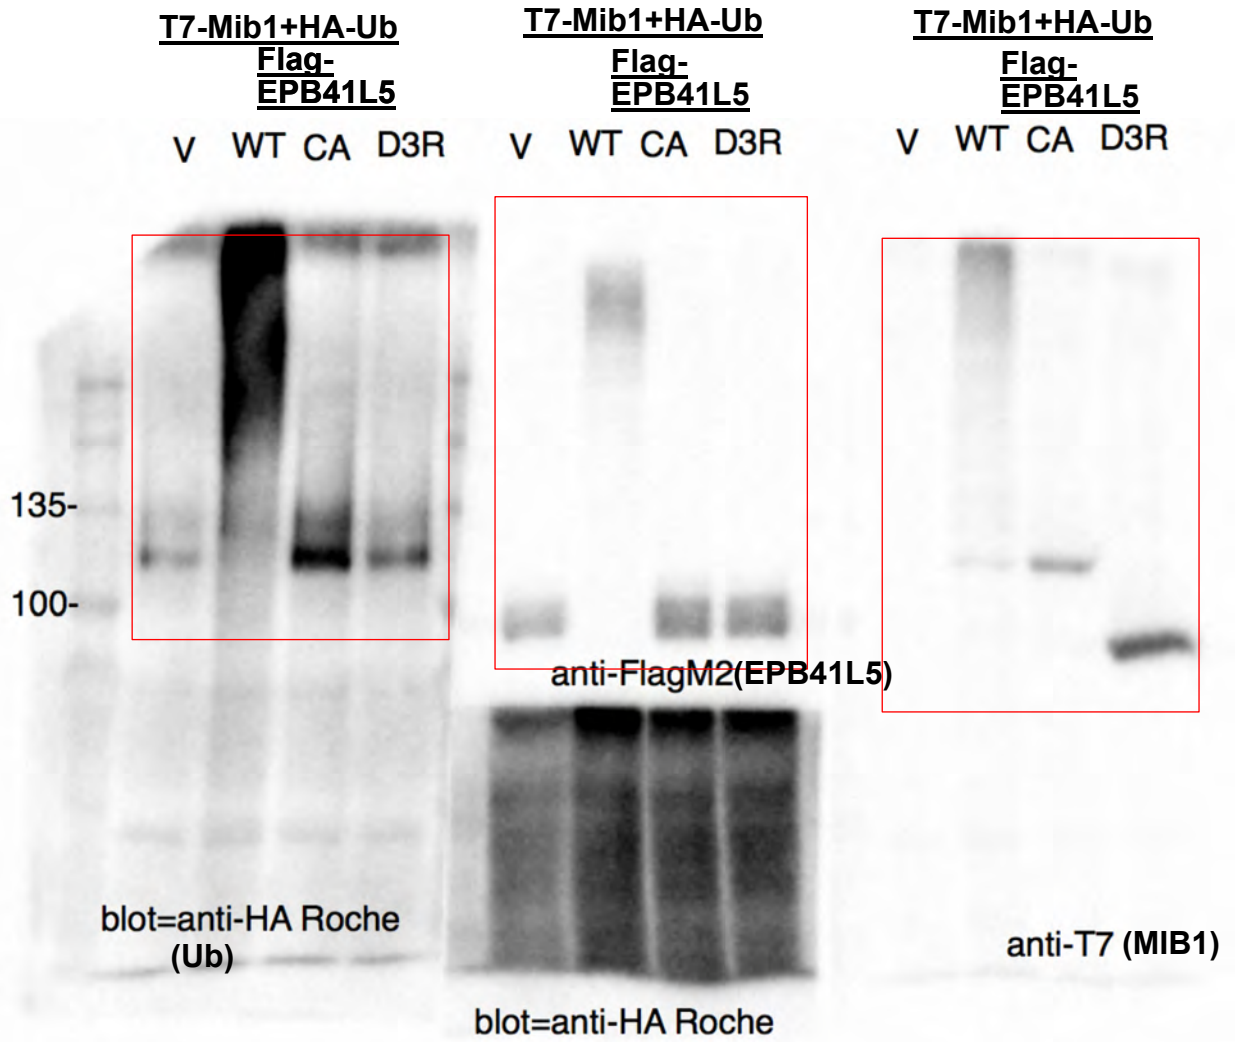



**Figure 6B original blots**

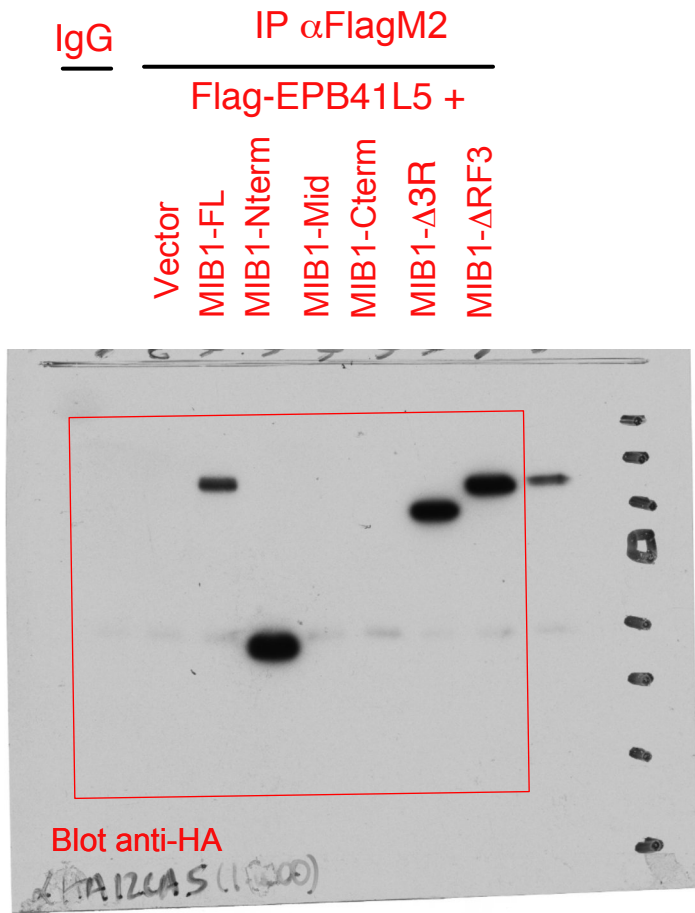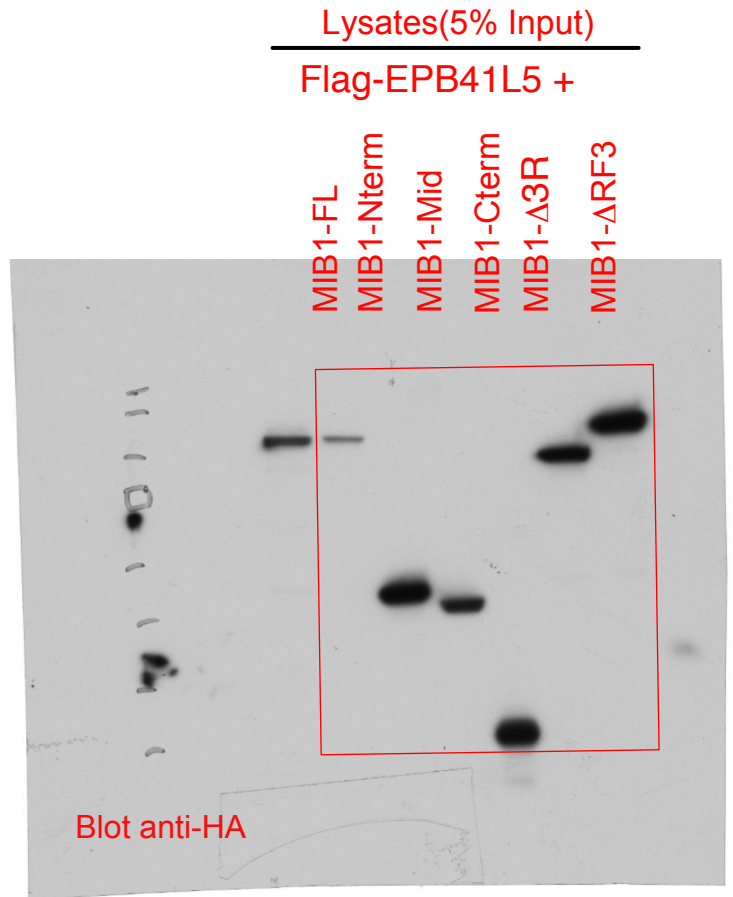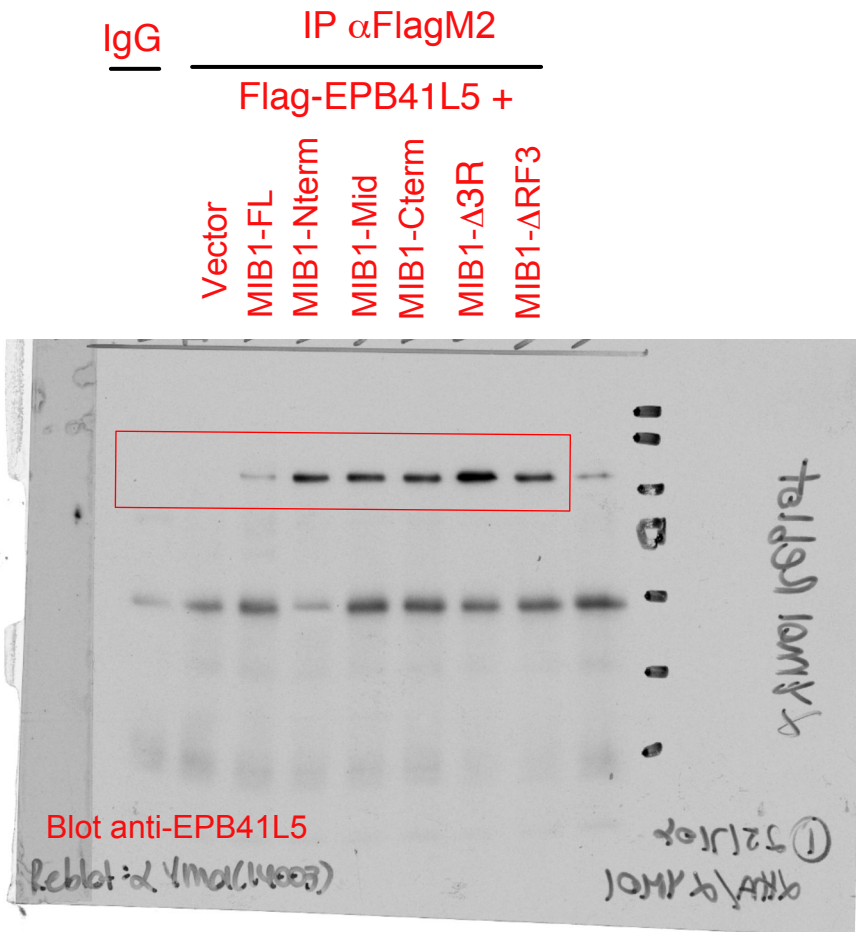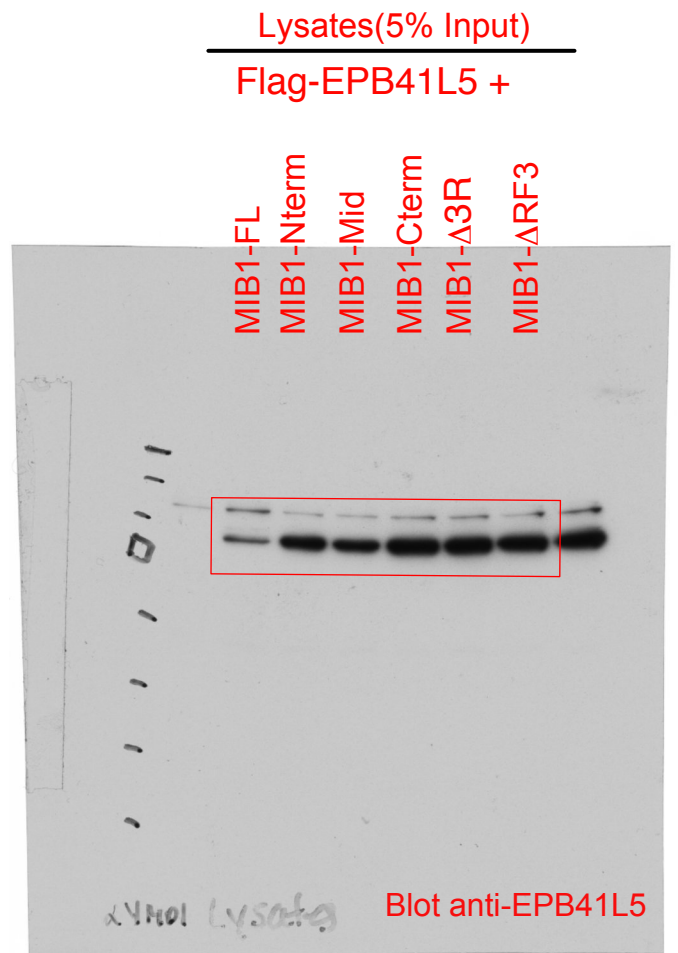

**Figure 6C original blots**

Flag-  
EPB41L5 +

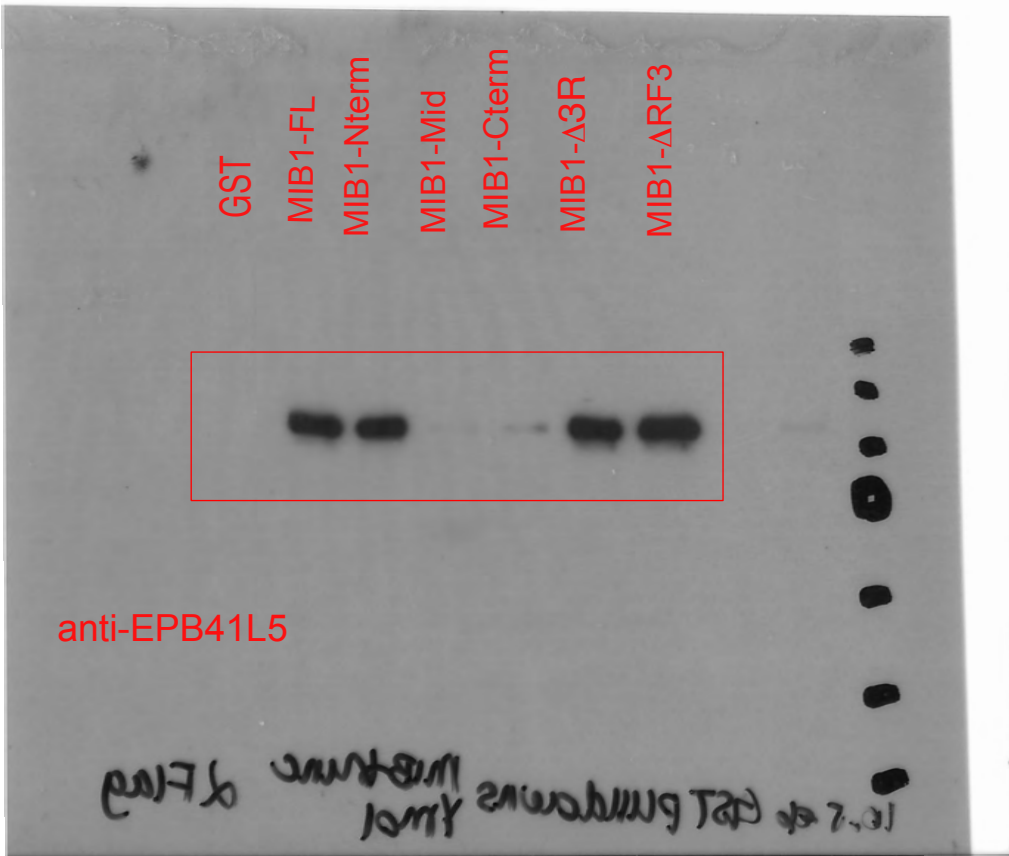

Flag-  
EPB41L5 +

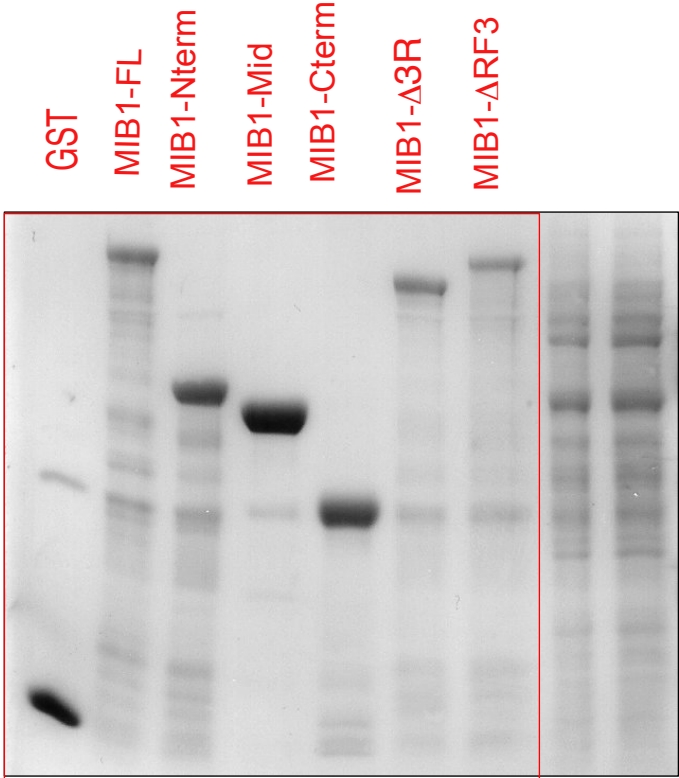

Coomassie

# Figure 6E original blots

- 1-Vector
- 2- EPB41L5 + MIB1wt
- 3- EPB41L5
- 4- EPB41L5 $\Delta$ PDB
- 5- EPB41L5 (1-660)
- 6- EPB41L5Nterm+FERM/FA
- 7- EPB41L5 (240-733)
- 8- EPB41L5 (333-733)
- 9- EPB41L5 $\Delta$ FA
- 10- EPB41L5 $\Delta$ FERM/FA

1 2 3 4 5 6 7 8 9 10

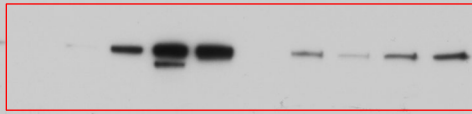

IP anti-Flag Blot  
anti-HA (MIB)

1 2 3 4 5 6 7 8 9 10

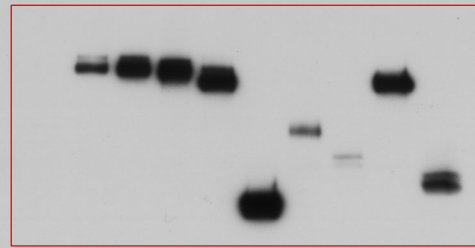

IP anti-Flag Blot anti-Flag

1 2 3 4 5 6 7 8 9 10

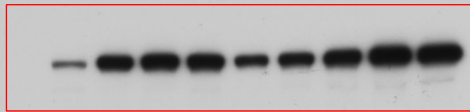

Lysates Blot anti-HA (MIB)

1 2 3 4 5 6 7 8 9 10

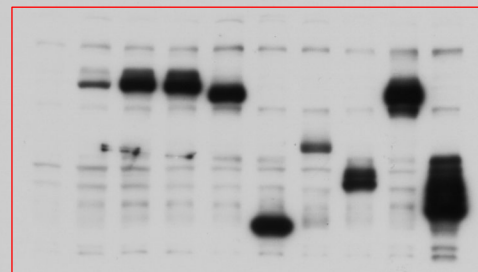

Lysates anti-FlagM2

# Figure 7A original blots

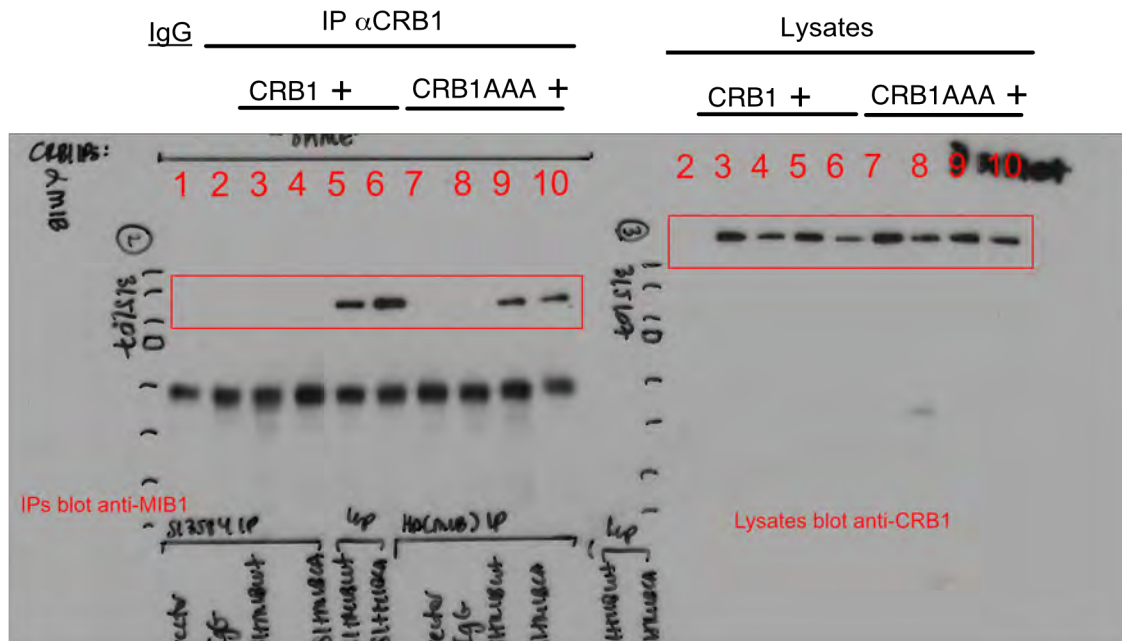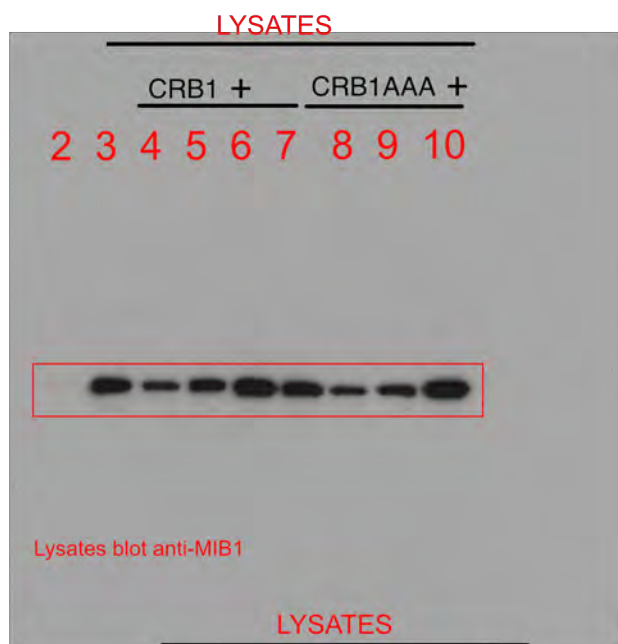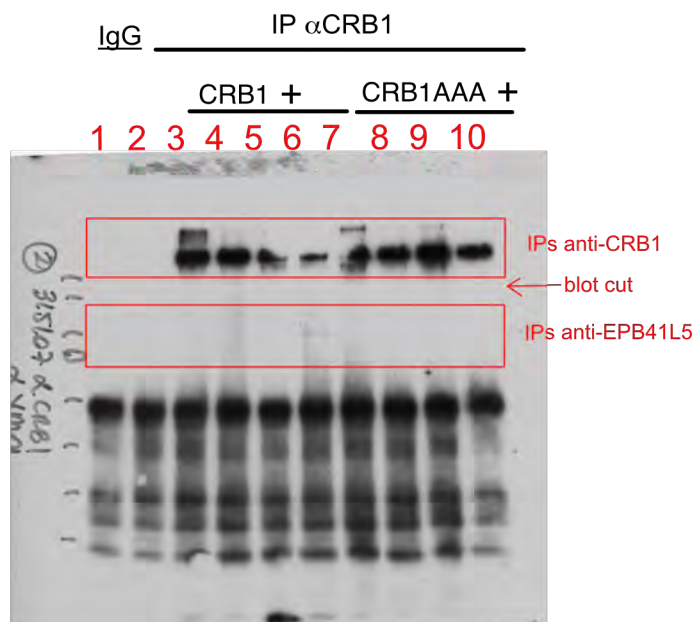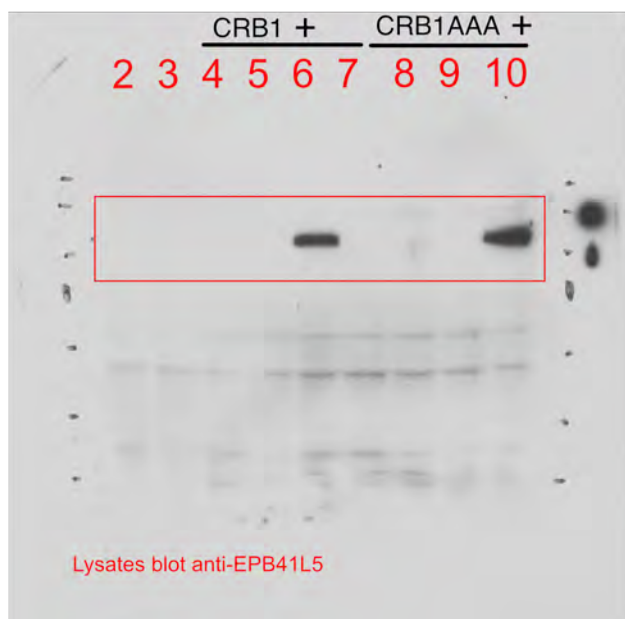

- 1- CRB1 + MIB1wt + EPB41L5
- 2- Vector
- 3- MIB1wt
- 4- MIB1wt + EPB41L5
- 5- MIB1CA
- 6- MIB1CA + EPB41L5
- 7- MIB1wt
- 8- MIB1wt + EPB41L5
- 9- MIB1CA
- 10- MIB1CA + EPB41L5



**Figure 7B original blots**

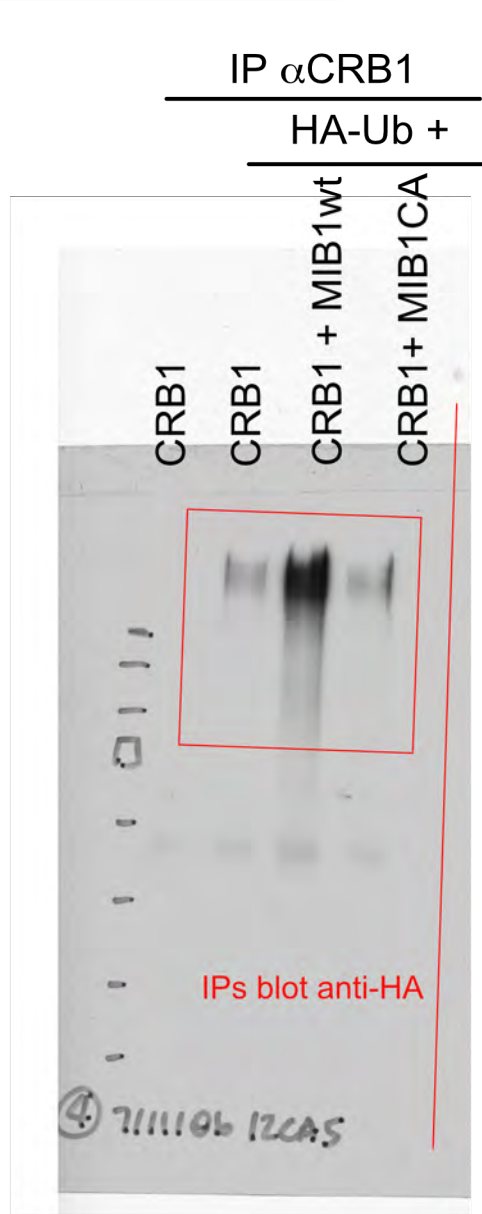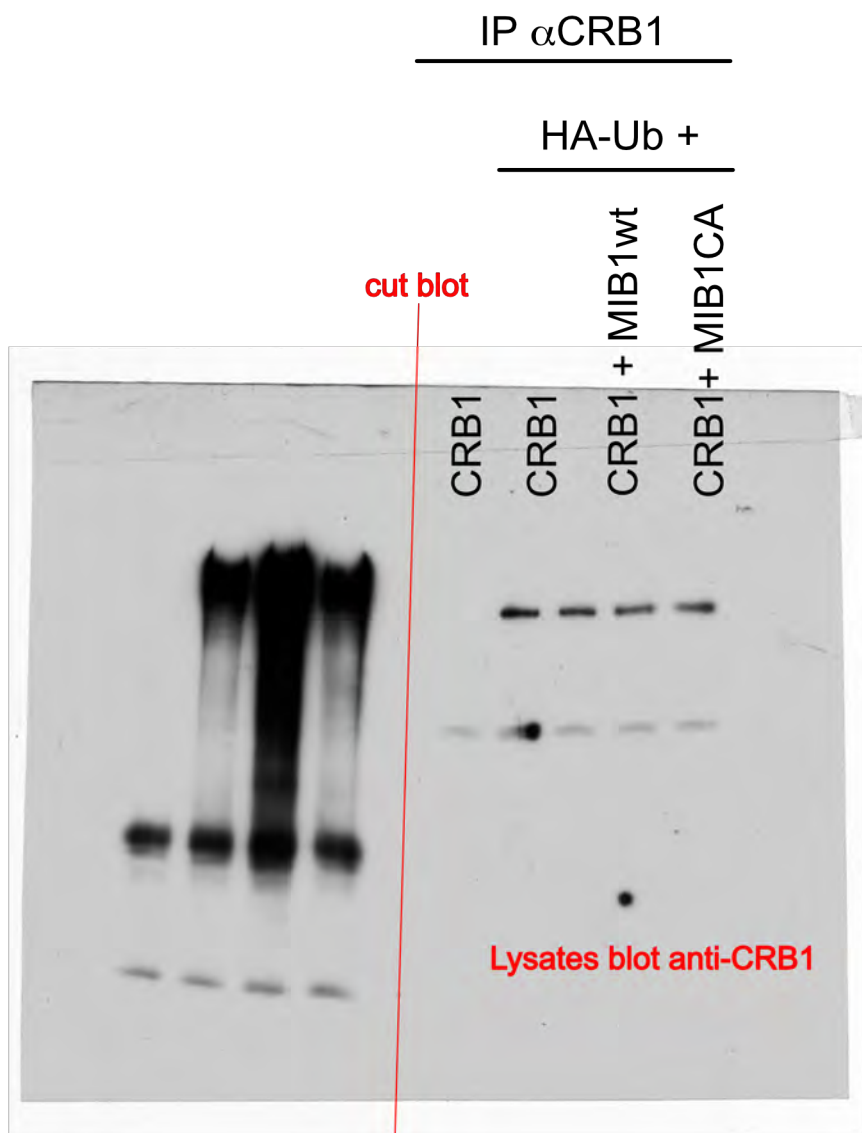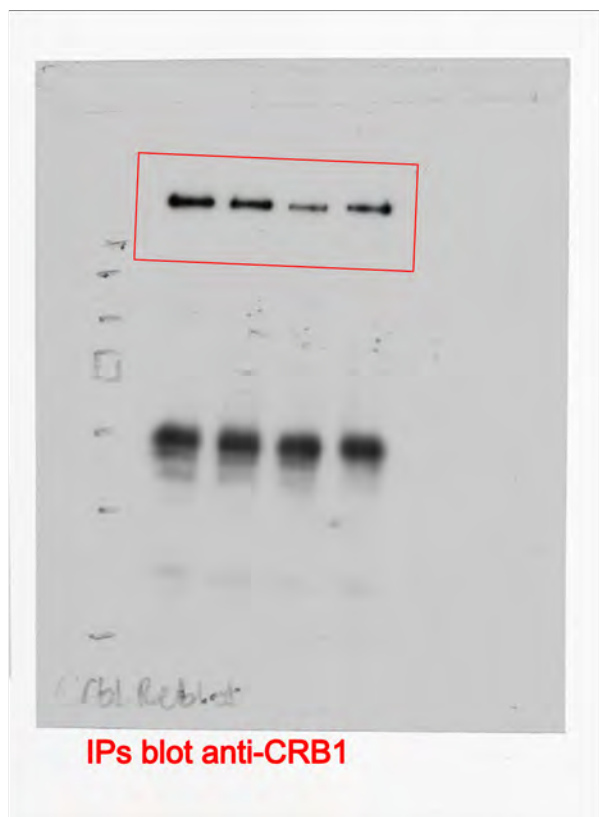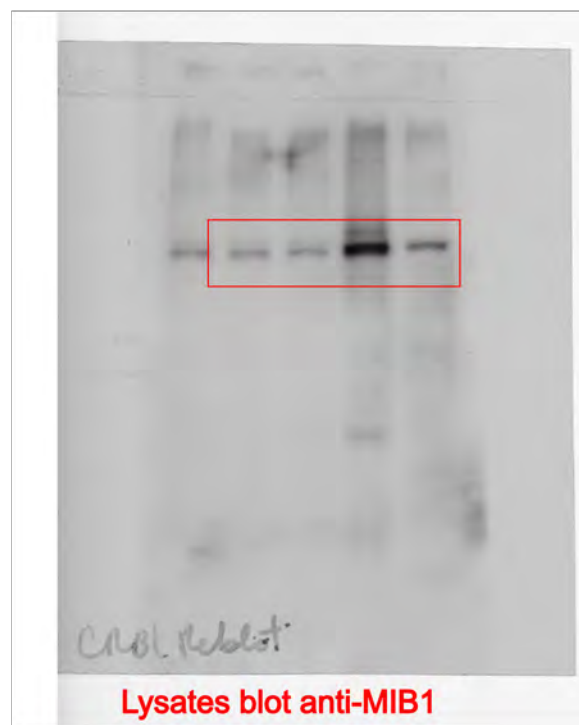

Supplement: 41598_2019_48902_MOESM2_ESM.pdf [file 41598_2019_48902_MOESM2_ESM.pdf]
